# Supplementary material for: Design, Synthesis and Molecular Docking Analysis of Flavonoid Derivatives as Potential Telomerase Inhibitors
Source: MDPI journal article supplement (doi:10.3390/molecules24173180), 2019-09-01
Supplement: s1 [file s1]

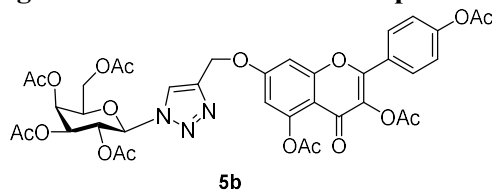

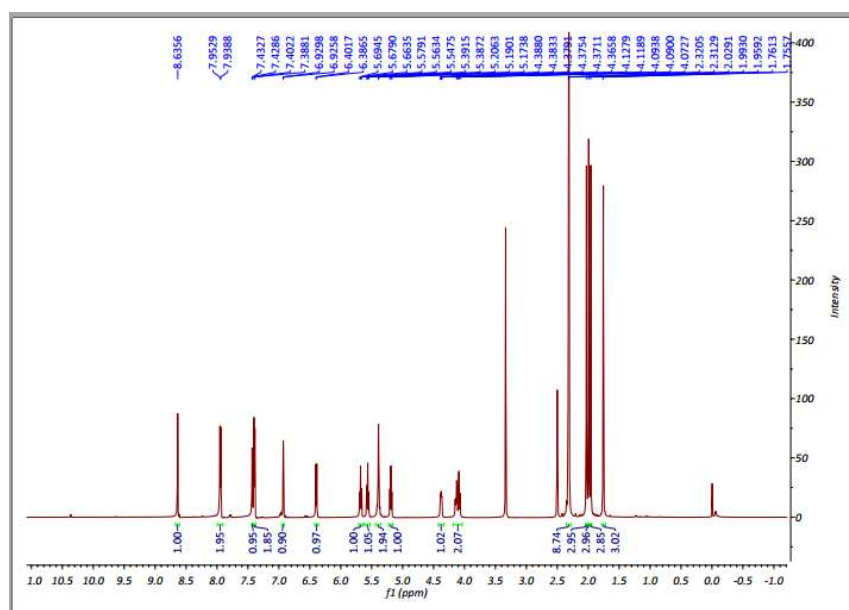

Figure S2. The  $^1\text{H}$ -NMR of compound 5b

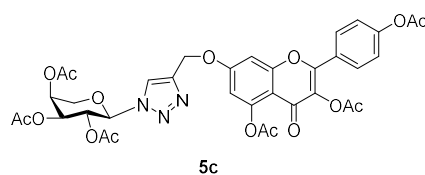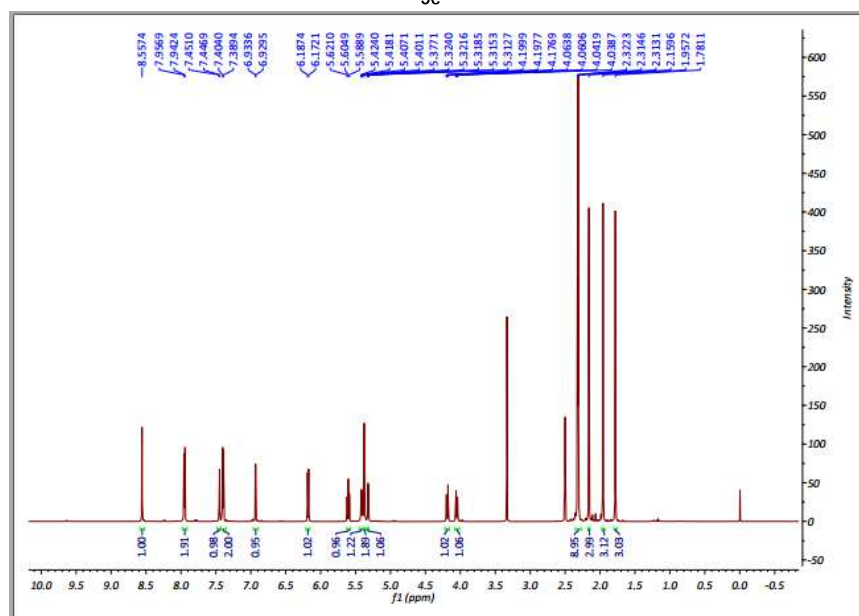

Figure S3. The  $^1\text{H}$ -NMR of compound 5c

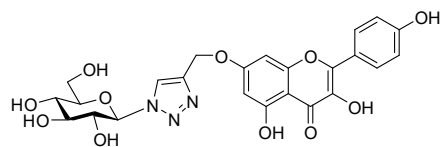

6a

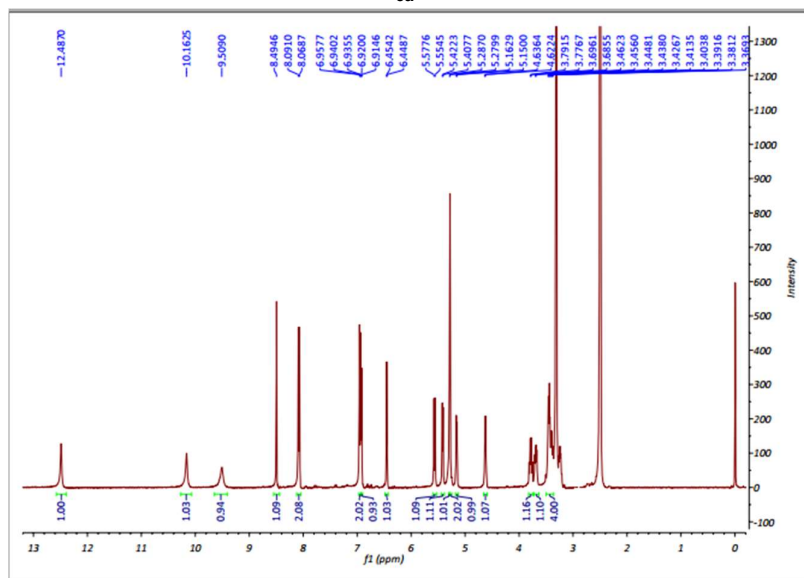

Figure S4. The  $^1\text{H}$ -NMR of compound 6a

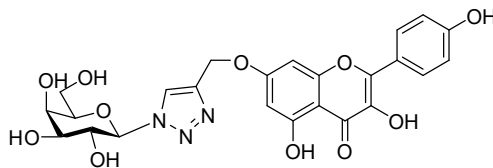

6b

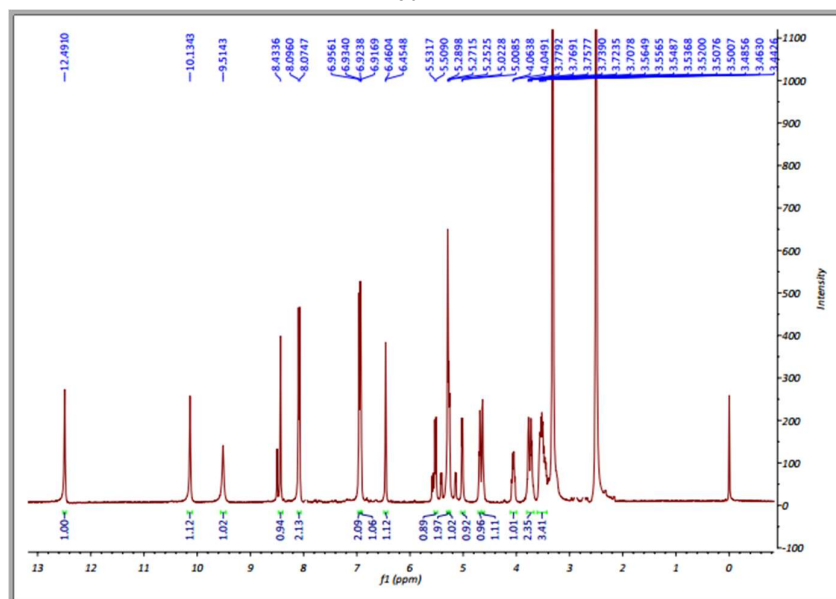

Figure S5. The  $^1\text{H}$ -NMR of compound 6b

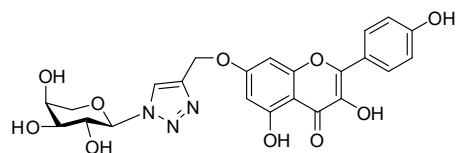

6c

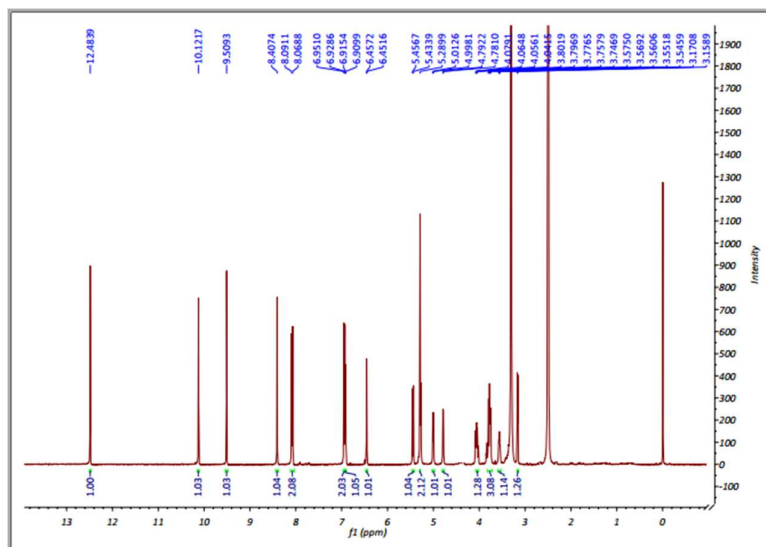

Figure S6. The  $^1\text{H}$ -NMR of compound 6c

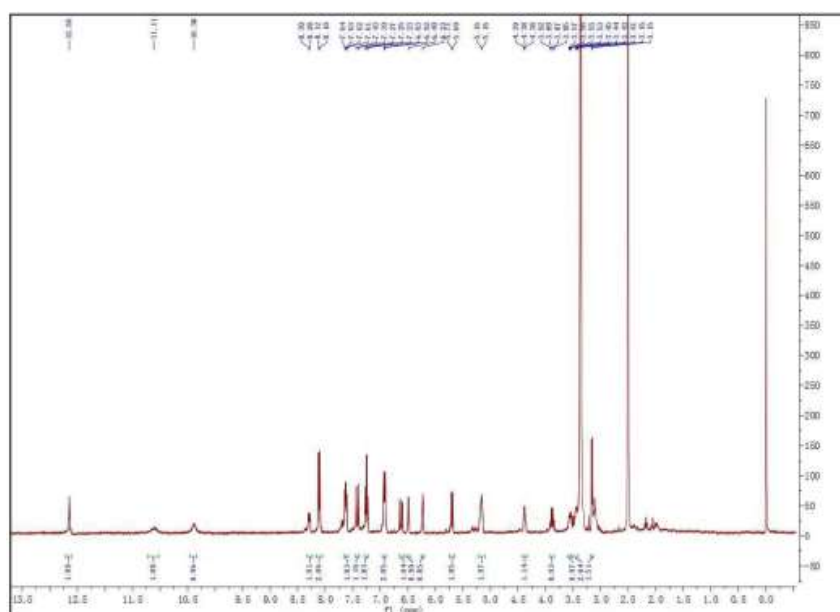

Figure S7. The  $^1\text{H}$ -NMR of compound 14a

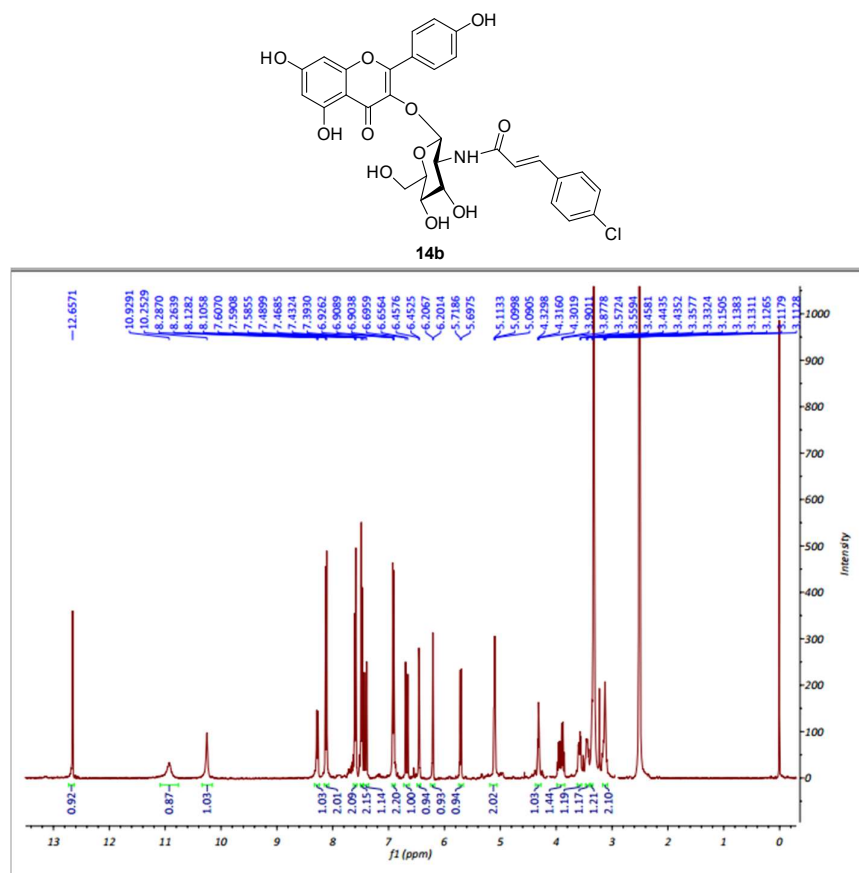

Figure S8. The  $^1\text{H}$ -NMR of compound **14b**

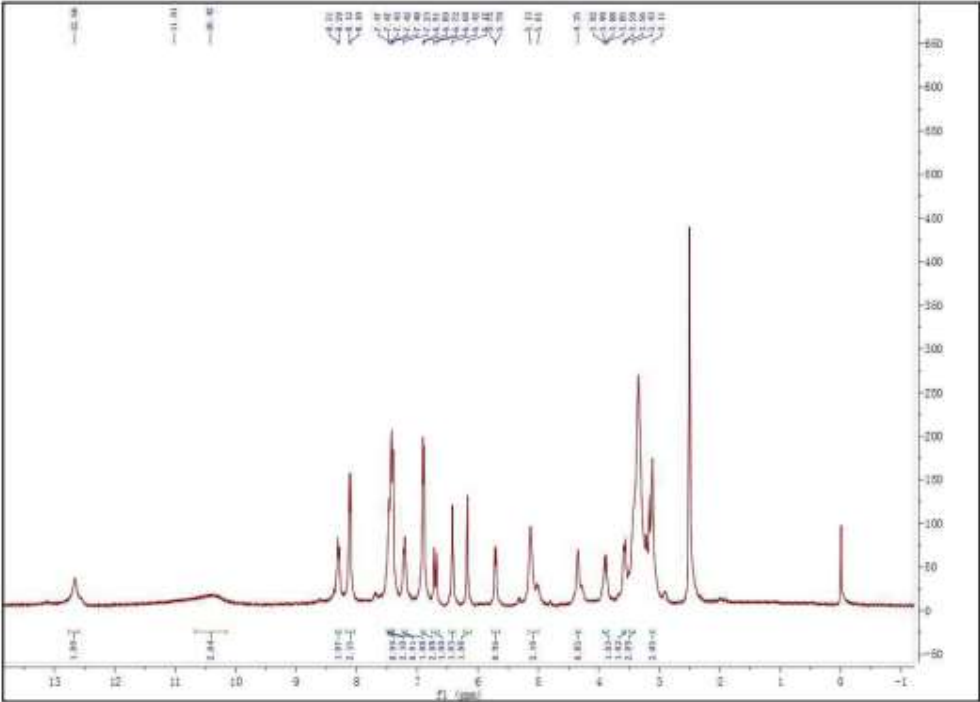

**Figure S9. The  $^1\text{H}$ -NMR of compound 14c**

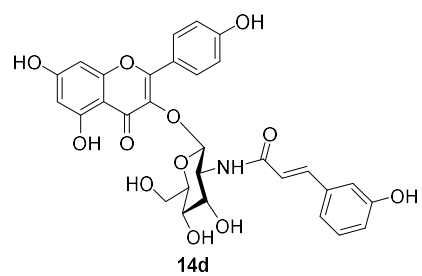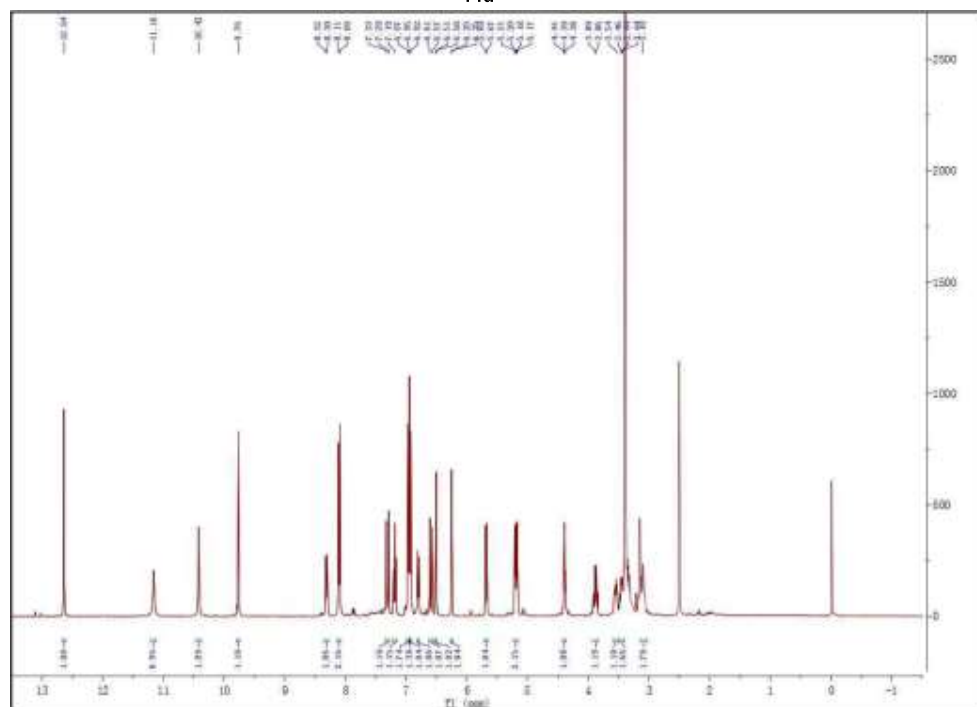

Figure S10. The <sup>1</sup>H-NMR of compound 14d

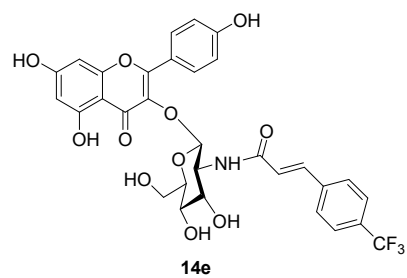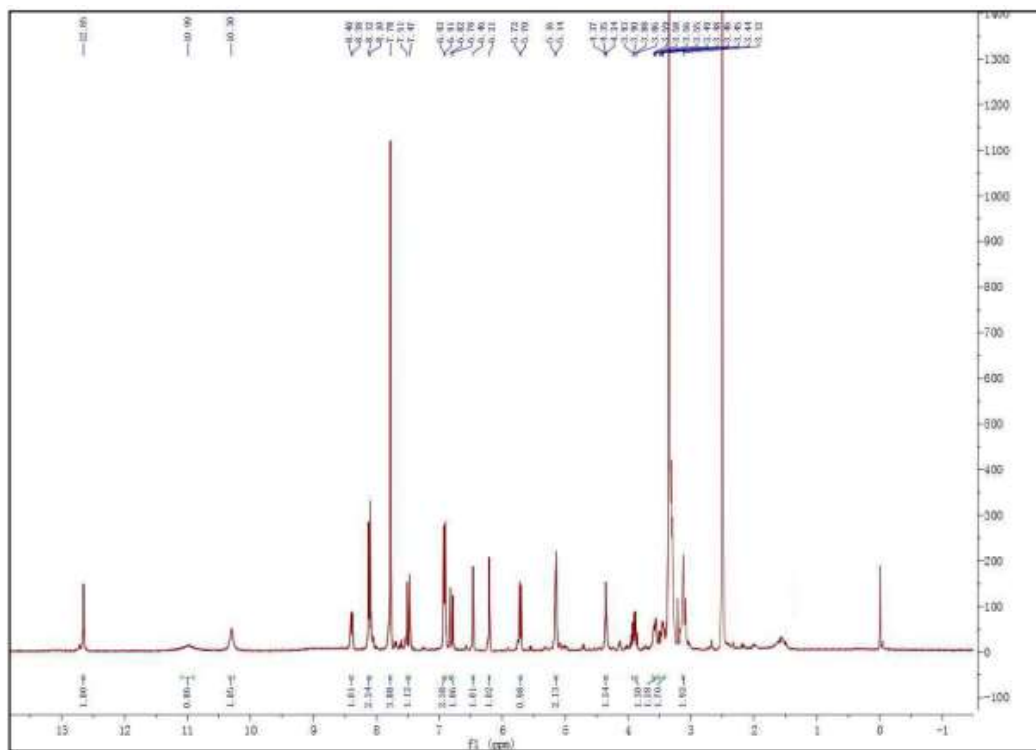

**Figure S11. The  $^1\text{H}$ -NMR of compound 14e**



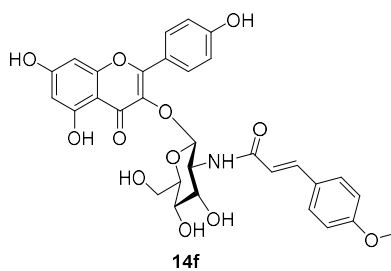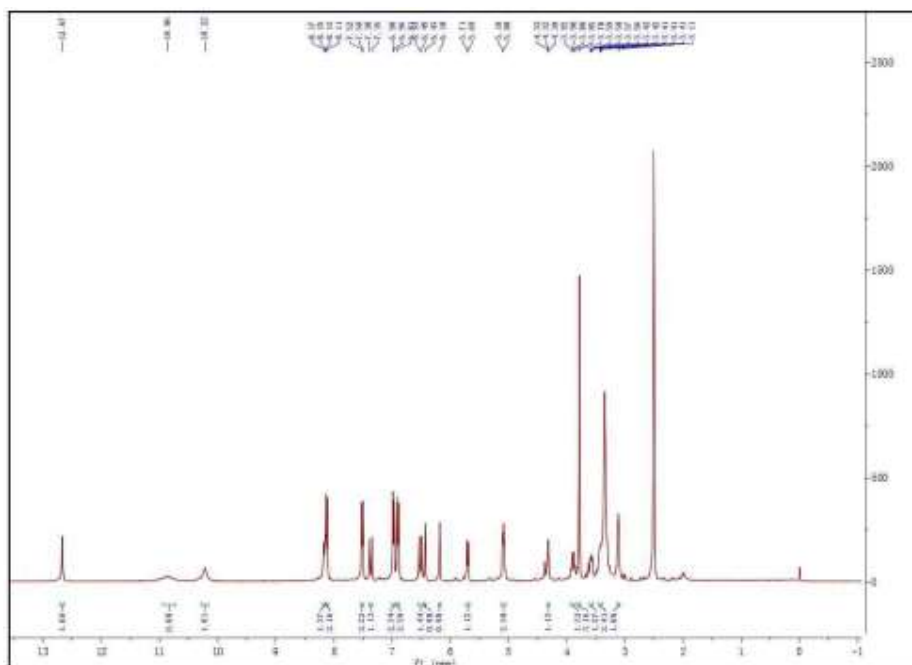

**Figure S12. The  $^1\text{H}$ -NMR of compound 14f**
